# Supplementary material for: Feasibility of dynamic chest radiography to calculate lung volumes in adult people with cystic fibrosis: a pilot study
Source: HighWire-hosted journal article supplement (doi:10.1136/bmjresp-2022-001309), 2023-05-01

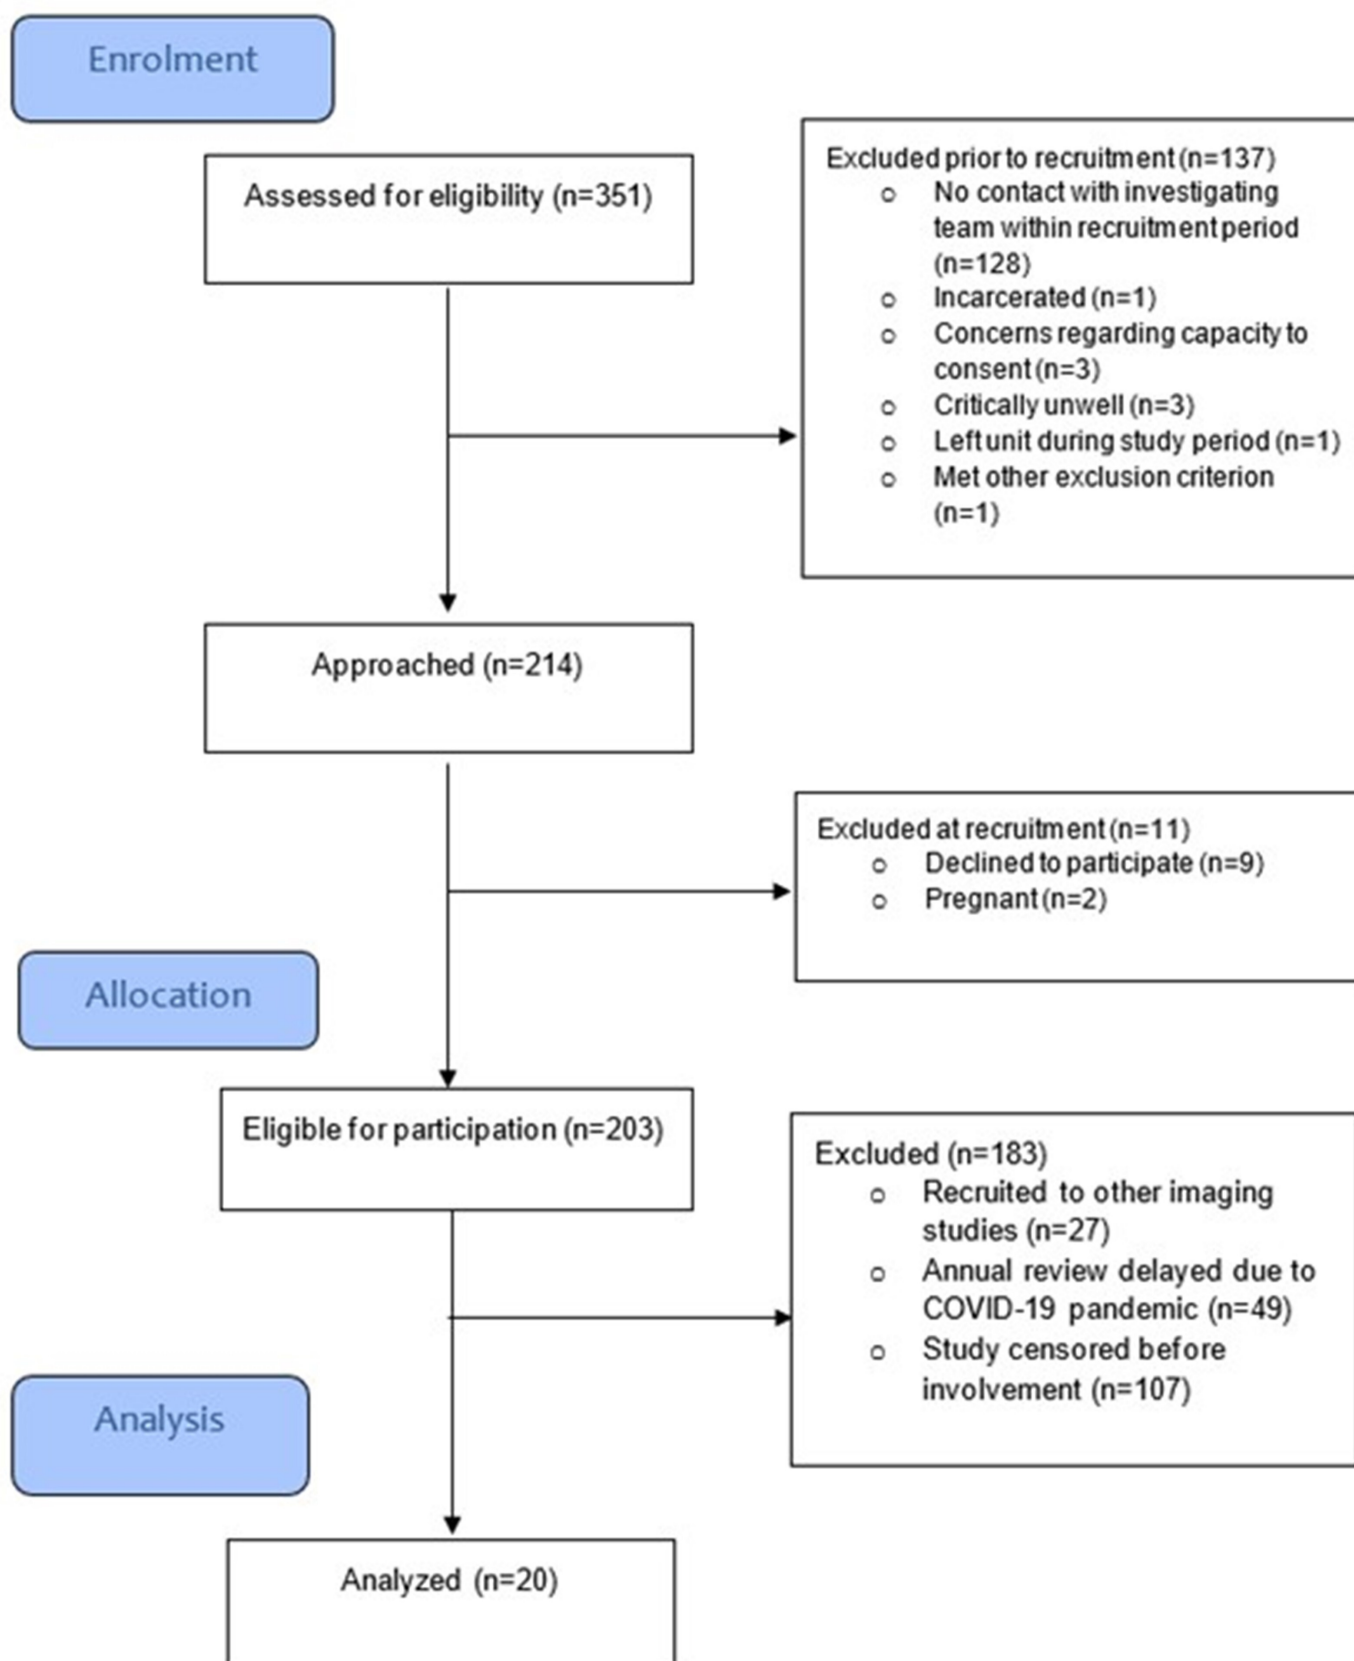

Supplement: bmjresp-2022-001309supp001_data_supplement.pdf [file bmjresp-2022-001309supp001_data_supplement.pdf]
